# Supplementary material
Source: ML conference proceedings conference paper supplement (https://openreview.net/forum?id=KLL70pTQ17)
Supplement: supplementary_material [file attachment]

## A MDP Examples

### A.1 LQR max-following parametric class vs. constituent policies

$$\begin{aligned} \min_{\{u_t\}_{t=0}^{\infty}} \quad & \sum_{t=0}^{\infty} \gamma^t (x_t^T Q x_t + u_t^T R u_t) \\ \text{subject to} \quad & x_{t+1} = A x_t + B u_t + w_t, \end{aligned}$$

To motivate the use of max-following policies in a richer class of MDPs, we consider a traditional control problem with continuous state and action spaces: the discrete linear quadratic regulator. Note that here we analyze the infinite horizon discounted case so that we can analyze the time-invariant value function, but episodic analogues exist. Consider the following setting where  $\gamma \in [0, 1]$  is a discount factor, and  $w_t \sim \mathcal{N}(\mathbf{0}, \sigma^2 I)$ . Here, we consider the simple case where  $Q, R, A = I$  and  $B = (1 + \epsilon)I$ . We know that the optimal policy is of the form  $u = -K^*x$  (Bertsekas, 2012) and we set two policies that are only stable along one component and unstable along the other of the form  $u_1 = -K_1 x$  and  $u_2 = -K_2 x$ . It is important to note that the value functions of the individual policies and the optimal policies have exact quadratic forms like  $V(x) = x^T P x + q$ , but the max-following policy is not necessarily within the same parametric class. For example,  $P_1$  is the solution to the Lyapunov equation  $P_1 = (I + K_1^T K_1 + \gamma(A - K_1)^T P_1 (A - K_1))$  and  $q_1 = \frac{\gamma}{1-\gamma} \sigma^2 \text{tr}(P_1)$ . A similar formula exists for policy 2.

In LQR, for the  $K_1, K_2$  controllers described above, a max-following policy is able to attain higher value than the individual expert policies that have an unstable direction in one axis. Moreover, we see that the optimal policy is obviously superior to all the other policies, but that a max-following policy is more competitive with it than the other individual expert policies. A max-following policy is ultimately able to benefit from the stabilizing component of each axis of the individual policies, which ultimately lets it perform better than any given individual one.

## B Additional Proofs

**Lemma 4.1** (Worst approximate max-following policy competes with best fixed policy). *For any  $\epsilon \in (0, 1]$  and any episode length  $H$ , let  $\beta \in \Theta(\frac{\epsilon}{H})$ . Then for any MDP  $\mathcal{M}$  with starting state distribution  $\mu_0$ , and any  $K$  policies  $\Pi^k$  defined on  $\mathcal{M}$ ,*

$$\min_{\pi \in \Pi_{\beta}^{k*}} \mathbb{E}_{s_0 \sim \mu_0} [V^{\hat{\pi}}(s_0)] \geq \max_{k \in [K]} \mathbb{E}_{s_0 \sim \mu_0} [V^k(s_0)] - O(\epsilon).$$

*Proof.* We will prove the claim inductively, showing that for all  $C \in [H]$ , if we run any approximate max-following policy for  $C$  steps, and then continue following the policy  $\pi^k$  chosen at step  $C$  for the rest of the episode, then our expected return is not much worse than if we had followed any fixed  $\pi^k$  for the whole episode.

Somewhat more formally, recalling the definition of the set of approximate max-following policies  $\Pi_{\beta}^{k*}$  (Definition 2.3), at every time  $h \in [H]$  and state  $s \in \mathcal{S}$ , a policy  $\pi \in \Pi_{\beta}^{k*}$  takes action  $\pi_h^t(s)$  for a  $\pi^t \in \Pi^k$  such that  $V_h^t(s) \geq \max_{k \in [K]} V_h^k(s) - \beta$ . Letting  $\pi^{t(s,h)}$  denote the  $\pi^t \in \Pi^k$  that  $\pi$  follows at state  $s$  and time  $h$ , we will show that if at some step  $C \in [H]$  we have

$$\mathbb{E}_{s_0 \sim \mu_0, P} \left[ \sum_{h=0}^C R(s_h, \pi_h(s_h)) + \sum_{h=C+1}^{H-1} R(s_h, \pi_h^{t(s_h, C)}(s_h)) \right] \geq \max_{k \in [K]} \mathbb{E}_{s_0 \sim \mu_0} [V^k(s_0)] - O(\frac{\epsilon(C+1)}{H}),$$

for all  $\pi \in \Pi_{\beta}^{k*}$ , then the same holds for  $C + 1$  for all  $\pi$ .

In the base case,  $C = 0$ , the claim

$$\mathbb{E}_{s_0 \sim \mu_0, P} \left[ \sum_{h=0}^{H-1} R(s_h, \pi_h^{t(s_0, 0)}(s_h)) \right] \geq \max_{k \in [K]} \mathbb{E}_{s_0 \sim \mu_0} [V^k(s_0)] - O(\frac{\epsilon}{H})$$

for all  $\pi \in \Pi_\beta^{k*}$  and all  $\pi^k \in \Pi^k$ , follows straightforwardly from the definition of  $\Pi_\beta^{k*}$  and setting of  $\beta \in \Theta(\frac{\varepsilon}{H})$ , since

$$\begin{aligned} \mathbb{E}_{s_0 \sim \mu_0, P} \left[ \sum_{h=0}^{H-1} R(s_h, \pi_h^{t(s_0, 0)}(s_h)) \right] &= \mathbb{E}_{s_0 \sim \mu_0} [V^{\pi^{t(s_0, 0)}}(s_0)] \\ &\geq \mathbb{E}_{s_0 \sim \mu_0} \left[ \max_{k \in [K]} V^k(s_0) - O(\frac{\varepsilon}{H}) \right] \\ &\geq \max_{k \in [K]} \mathbb{E}_{s_0 \sim \mu_0} [V^k(s_0)] - O(\frac{\varepsilon}{H}). \end{aligned}$$

We now prove the inductive step. We wish to show that if at step  $C$ , we have for some  $\pi \in \Pi_\beta^{k*}$

$$\mathbb{E}_{s_0 \sim \mu_0, P} \left[ \sum_{h=0}^C R(s_h, \pi_h(s_h)) + \sum_{h=C+1}^{H-1} R(s_h, \pi_h^{t(s_C, C)}(s_h)) \right] \geq \max_{k \in [K]} \mathbb{E}_{s_0 \sim \mu_0} [V^k(s)] - O(\frac{\varepsilon(C+1)}{H}),$$

then continuing to follow  $\pi$  at step  $C+1$  and following  $\pi^{t(s_{C+1}, C+1)}$  thereafter reduces expected return by  $O(\frac{\varepsilon}{H})$ . Now if  $\pi_{C+1}(s_{C+1}) = \pi_{C+1}^t(s_{C+1})$  for  $\pi^t \in \Pi^k$ , it must be the case that

$$V_{C+1}^t(s_{C+1}) \geq \max_{k \in [K]} V_{C+1}^k(s_{C+1}) - O(\frac{\varepsilon}{H}),$$

otherwise  $\pi \notin \Pi_\beta^{k*}$ . It follows that

$$\begin{aligned} \mathbb{E}_{s_0 \sim \mu_0, P} &\left[ \sum_{h=0}^{C+1} R(s_h, \pi_h(s_h)) + \sum_{h=C+2}^{H-1} R(s_h, \pi_h^{t(s_{C+1}, C+1)}(s_h)) \right] \\ &= \mathbb{E}_{s_0 \sim \mu_0, P} \left[ \sum_{h=0}^C R(s_h, \pi_h(s_h)) + V_{C+1}^{t(s_{C+1}, C+1)}(s_{C+1}) \right] \quad (\text{by definition of } V \text{ and } \pi_{C+1}(s_{C+1})) \\ &\geq \mathbb{E}_{s_0 \sim \mu_0, P} \left[ \sum_{h=0}^C R(s_h, \pi_h(s_h)) + \max_{k \in [K]} V_{C+1}^k(s_{C+1}) - O(\frac{\varepsilon}{H}) \right] \quad (\text{from } \pi \in \Pi_\beta^{k*}) \\ &\geq \mathbb{E}_{s_0 \sim \mu_0, P} \left[ \sum_{h=0}^C R(s_h, \pi_h(s_h)) + V_{C+1}^{t(s_C, C)}(s_{C+1}) - O(\frac{\varepsilon}{H}) \right] \\ &= \mathbb{E}_{s_0 \sim \mu_0, P} \left[ \sum_{h=0}^C R(s_h, \pi_h(s_h)) + \sum_{h=C+1}^{H-1} R(s_h, \pi_h^{t(s_C, C)}(s_h)) \right] - O(\frac{\varepsilon}{H}) \quad (\text{by definition of } V) \\ &\geq \max_{k \in [K]} \mathbb{E}_{s_0 \sim \mu_0} [V^k(s)] - O(\frac{\varepsilon(C+2)}{H}) \quad (\text{by inductive hypothesis}) \end{aligned}$$

and so the claim holds for time  $C+1$ , for any  $\pi \in \Pi_\beta^{k*}$  for which it holds for time  $C$ . We showed the base case  $C=0$  hold for all  $\pi \in \Pi_\beta^{k*}$ , and therefore we have

$$\mathbb{E}_{s_0 \sim \mu_0, P} \left[ \sum_{h=0}^C R(s_h, \pi_h(s_h)) + \sum_{h=C+1}^{H-1} R(s_h, \pi_h^{t(s_C, C)}(s_h)) \right] \geq \max_{k \in [K]} \mathbb{E}_{s_0 \sim \mu_0} [V^k(s)] - O(\frac{\varepsilon(C+1)}{H})$$

for all  $C \in [H]$ . In particular, for  $C = H-1$  we conclude that

$$\mathbb{E}_{s_0 \sim \mu_0, P} \left[ \sum_{h=0}^C R(s_h, \pi_h(s_h)) \right] \geq \max_{k \in [K]} \mathbb{E}_{s_0 \sim \mu_0} [V^k(s)] - O(\varepsilon)$$

and it follows that

$$\min_{\pi \in \Pi_\beta^{k*}} \mathbb{E}_{s_0 \sim \mu_0} [V^{\hat{\pi}}(s_0)] \geq \max_{k \in [K]} \mathbb{E}_{s_0 \sim \mu_0} [V^k(s_0)] - O(\varepsilon).$$

## 513 C Additional information about experiments

514 For our experiments, we use a heuristic version of MaxIteration that operates in rounds. First, the  
 515 algorithm collects a set of trajectories using every policy to initialize the respective value functions.  
 516 Then, in every round the algorithm for every policy executes the max-following policy for  $\beta$  steps  
 517 and then switches to the respective constituent policy. At the end of each round, value functions of  
 518 constituent policies are updated.  $\beta$  is uniformly spaced along the full horizon and thus, depends on  
 519 the number of rounds and the horizon. The total number of episodes is an upper bound on the number  
 520 of samples collected which is what we determine to compare run-times between MaxIteration and  
 521 IQL. Finally, we use a  $\gamma$  discounting which has been shown to have regularizing effects on the value  
 522 function updates [Amit et al., 2020].

523 For IQL, we use the d3rlpy implementations [Seno and Imai, 2022] and code provided by [Hussing  
 524 et al., 2023].

### 525 C.1 Hyperparameters

526 Both algorithms are run for 10'000 steps initially (to initialize value functions for MaxIteration and  
 527 to pre-fill the buffer for IQL) before doing updates and then for 50'000 steps for online training.

528 All neural networks use ReLU [Glorot et al., 2011] Multi-layer perceptrons with 2 layers and a hidden  
 529 dimension of 256 per layer.

Table 1: Hyperparameters for MaxIteration

|                                    |          |
|------------------------------------|----------|
| Optimizer                          | Adam     |
| Adam $\beta_1$                     | 0.9      |
| Adam $\beta_2$                     | 0.999    |
| Adam $\varepsilon$                 | $1e - 8$ |
| Value Function Learning Rate       | $1e - 4$ |
| Number of rounds                   | 50       |
| Number of gradient steps per round | 40'000   |
| Batch Size                         | 64       |
| $\gamma$                           | 0.99     |

Table 2: Hyperparameters for Implicit Q-Learning

|                      |                      |
|----------------------|----------------------|
| Optimizer            | Adam                 |
| Adam $\beta_1$       | 0.9                  |
| Adam $\beta_2$       | 0.999                |
| Adam $\varepsilon$   | $1e - 8$             |
| Actor Learning Rate  | $4e - 3$             |
| Critic Learning Rate | $4e - 3$             |
| Batch Size           | $\#Tasks \times 256$ |
| n_steps              | 1                    |
| $\gamma$             | 0.99                 |
| $\tau$               | 0.005                |
| n_critics            | 2                    |
| expectile            | 0.7                  |
| weight_temp          | 3.0                  |
| max_weight           | 100                  |

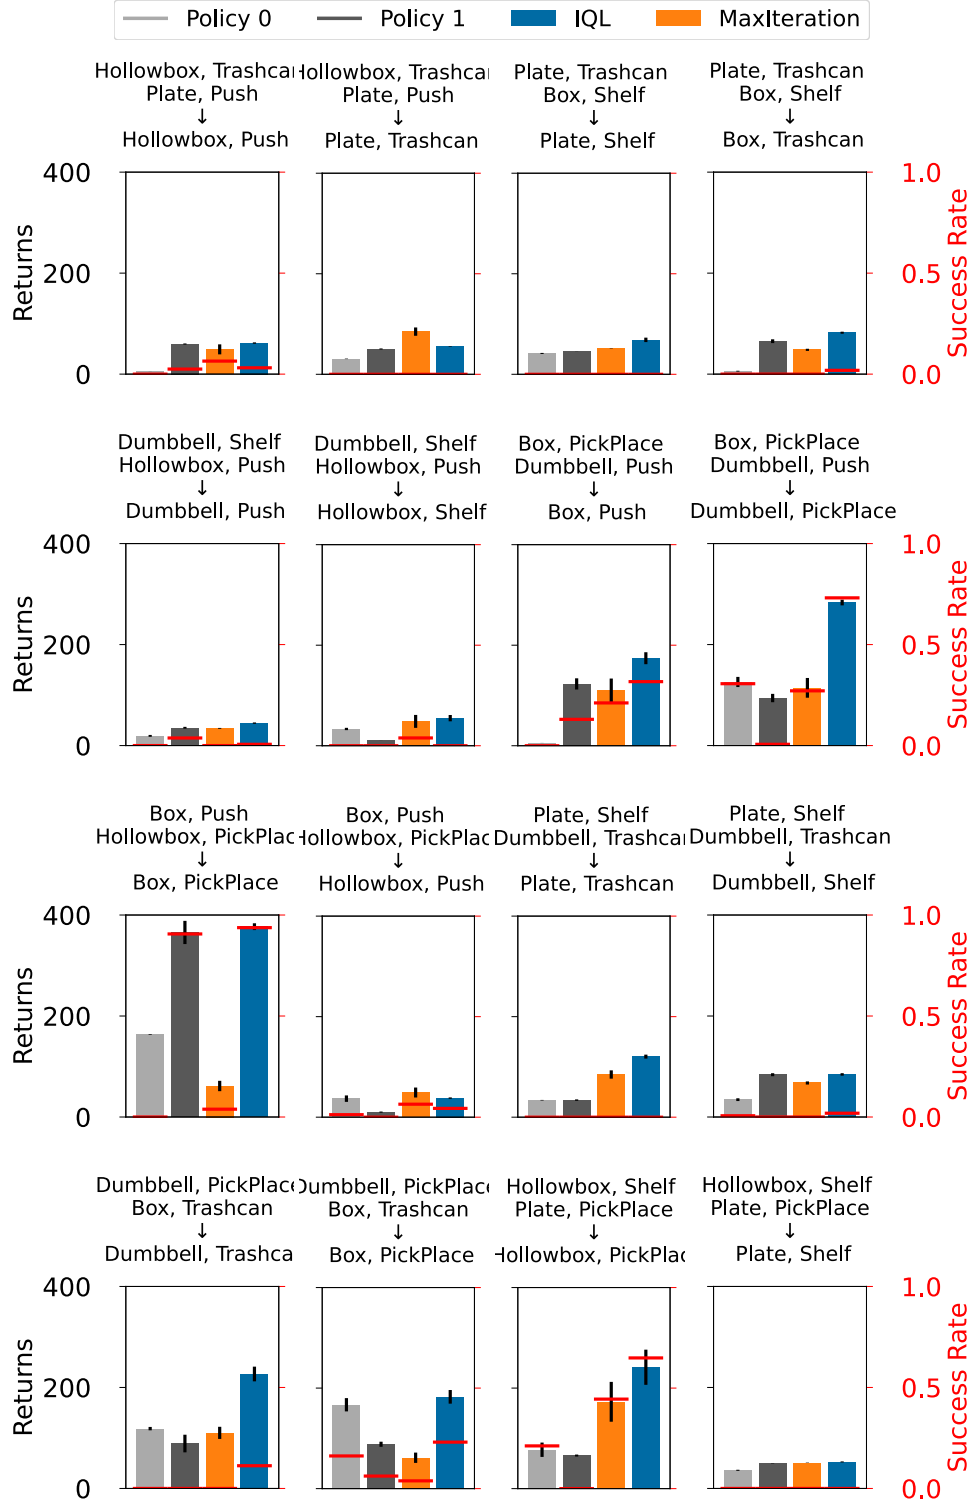

Figure 4

### 531 C.3 Results on DM Control

532 We run our MaxIteration algorithm on the DM Control benchmarks [Tunyasuvunakool et al., 2020]  
 533 similar to the MAPS [Liu et al., 2023] setup. In their setup, the constituent policies correspond to  
 534 different 3 checkpointed models in one run of the online Soft-Actor critic [Haarnoja et al., 2018]  
 535 algorithm. As a result, it is generally true that the latest checkpointed model will outperform the  
 536 previous two checkpoints meaning one constituent policy is strictly better everywhere than the others.  
 537 We report the final performance over 5 seeds using 16 evaluation trajectories in Figure 5. The  
 538 results show that our algorithm behaves as expected and always uses the best oracle. Without policy  
 539 improvement operator, this setup does not allow us to exceed the performance of the constituent  
 540 policies.

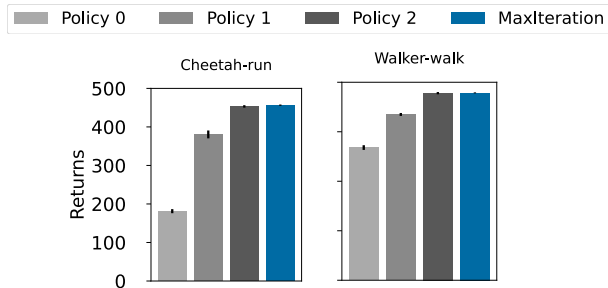

Figure 5: Mean return over 5 seeds of MaxIteration on DM Control tasks [Tunyasuvunakool et al., 2020]. Error-bars correspond to standard error. MaxIteration always selects the best performing constituent policy.

### 541 C.4 Computational Resources

542 Our experiments were conducted using a total of 17 GPUs including both server-grade (e.g., NVIDIA  
 543 RTX A6000s) and consumer-grade (e.g., NVIDIA RTX 3090) GPUs. Training the constituent policies  
 544 from offline data takes less than 2 hours. Our MaxIteration algorithm takes about 3 hours to train  
 545 while the baseline fine-tuning takes around 1 hour. A large chunk of the runtime cost stems from  
 546 executing the simulator.
